# Supplementary material for: Real world hospital costs following stress echocardiography in the UK: a costing study from the EVAREST/BSE-NSTEP multi-centre study
Source: PubMed Central journal article supplement (PMC10230715; doi:10.1186/s44156-023-00020-1), 2023-05-31

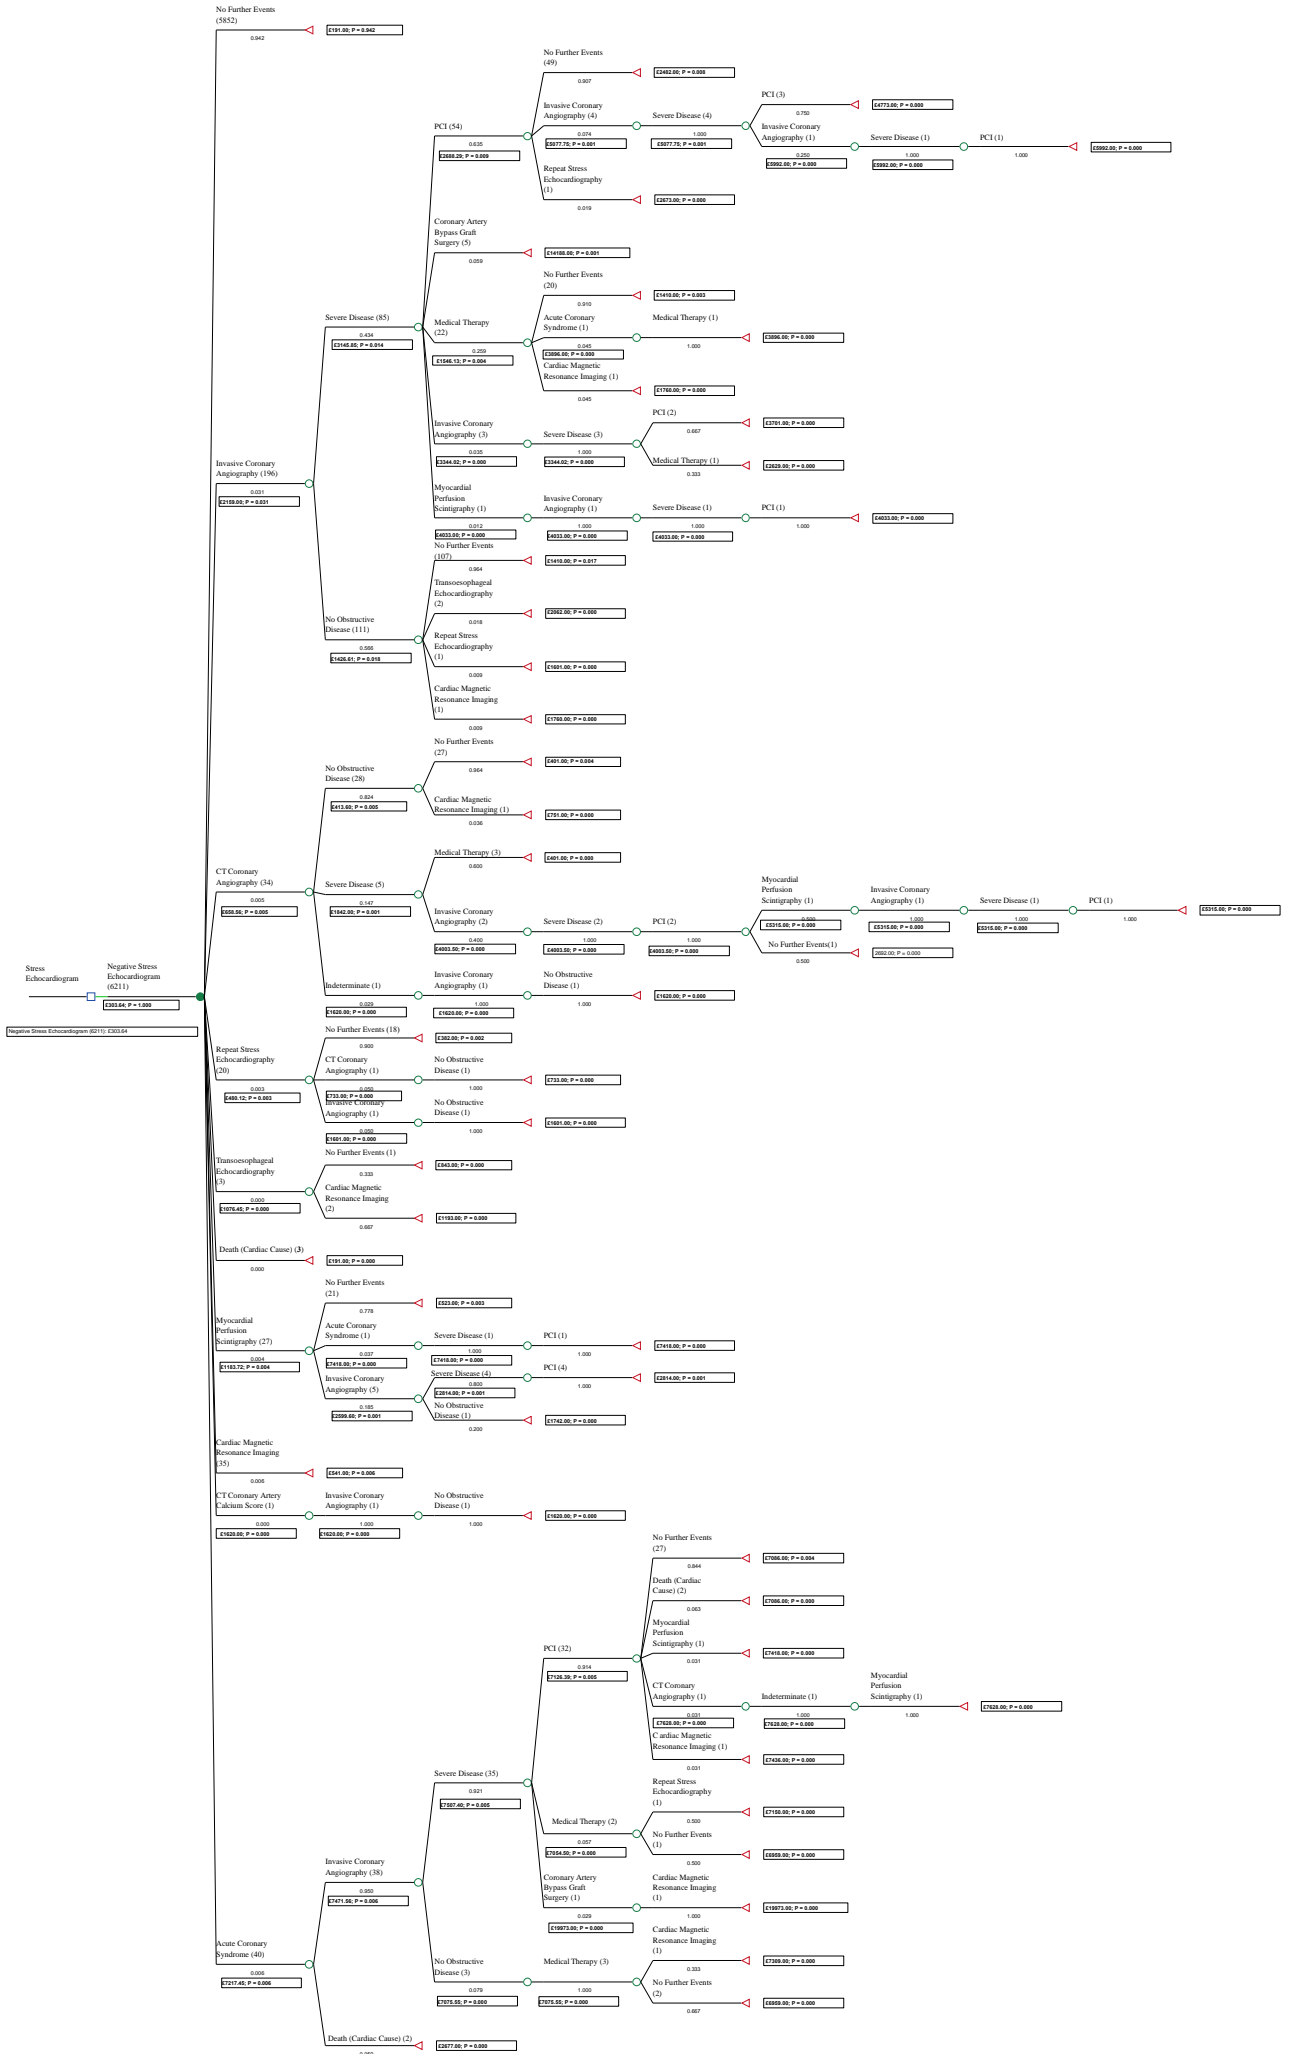

Supplement: 44156_2023_20_MOESM5_ESM.pdf [file 44156_2023_20_MOESM5_ESM.pdf]
